# Supplementary material
Source: ML conference proceedings conference paper supplement (https://proceedings.mlr.press/v139/you21a.html)
Supplement: Supplementary file [file you21a-supp.pdf]

# Graph Contrastive Learning Automated

## (Appendix)

Yuning You<sup>1</sup> Tianlong Chen<sup>2</sup> Yang Shen<sup>1</sup> Zhangyang Wang<sup>2</sup>

### A. Alternating Gradient Descent for JOAOv2

We adapt alternating gradient descent (AGD) in Algorithm 1 to optimize (10) in main text, executed as Algorithm S1, with the following modified upper-level minimization and lower-level maximization.

---

#### Algorithm S1 AGD for optimization (10) in main text

---

**Input:** initial parameter  $\theta^{(0)}$ , sampling distribution  $\mathbb{P}_{(A_1, A_2)}^{(0)}, \mathbb{P}_{(\Theta_1', \Theta_2')}^{(0)} = \mathbb{P}_{(A_1, A_2)}^{(0)}$ , optimization step  $N$ .

**for**  $n = 1$  **to**  $N$  **do**

1. Upper-level minimization: fix  $\mathbb{P}_{(A_1, A_2)}^{(n-1)}, \mathbb{P}_{(\Theta_1', \Theta_2')}^{(n-1)}$ , and call equation (1) to update  $\theta^{(n)}$ .

2. Lower-level maximization: fix  $\theta^{(n)}$ , call equation (3) to update  $\mathbb{P}_{(A_1, A_2)}^{(n)}$ , and set  $\mathbb{P}_{(\Theta_1', \Theta_2')}^{(n)} = \mathbb{P}_{(A_1, A_2)}^{(n)}$ .

**end for**

**Return:** Optimized parameter  $\theta^{(N)}$ .

---

**Upper-level minimization.** The upper-level minimization w.r.t.  $\theta$  given the sampling distribution  $\mathbb{P}_{(A_1, A_2)}$ , setting  $\mathbb{P}_{(\Theta_1', \Theta_2')} = \mathbb{P}_{(A_1, A_2)}$ , is represented as:

$$\theta^{(n)} = \theta^{(n-1)} - \alpha' \nabla_{\theta} \mathcal{L}_{v2}(\mathbf{G}, A_1, A_2, \theta', \Theta_1', \Theta_2'), \quad (1)$$

where  $\alpha' \in \mathcal{R}_{>0}$  is the learning rate.

**Lower-level maximization.** To calculate the gradient of the lower-level objective w.r.t.  $\mathbb{P}_{(A_1, A_2)}$ , we make similar

---

<sup>1</sup>Texas A&M University <sup>2</sup>The University of Texas at Austin. Correspondence to: Yang Shen <yshen@tamu.edu>, Zhangyang Wang <atlaswang@utexas.edu>.

efforts to approximate the contrastive loss as:

$$\begin{aligned} & \mathcal{L}_{v2}(\mathbf{G}, A_1, A_2, \theta', \Theta_1', \Theta_2') \\ & \approx \sum_{i=1}^{|\mathcal{A}|} \sum_{j=1}^{|\mathcal{A}|} p_{ij} \ell_{v2}(\mathbf{G}, A^i, A^j, \theta', \theta''^i, \theta''^j) \\ & = \sum_{i=1}^{|\mathcal{A}|} \sum_{j=1}^{|\mathcal{A}|} p_{ij} \left\{ -\mathbb{E}_{\mathbb{P}_{\mathcal{G}}} \text{sim}(T_{v2, \theta}^i(\mathbf{G}), T_{v2, \theta}^j(\mathbf{G})) \right. \\ & \quad \left. + \mathbb{E}_{\mathbb{P}_{\mathcal{G}}} \log(\mathbb{E}_{\mathbb{P}_{\mathcal{G}'}} \exp(\text{sim}(T_{v2, \theta}^i(\mathbf{G}), T_{v2, \theta}^j(\mathbf{G}')))) \right\}, \quad (2) \end{aligned}$$

where  $T_{v2, \theta}^i = A^i \circ f_{\theta'} \circ g_{\theta''^i}$ ,  $i = 1, \dots, 5$ . Thus, projected gradient descent is performed as:

$$\mathbf{b} = \mathbf{p}^{(n-1)} + \alpha'' \nabla_{\mathbf{p}} \psi_{v2}(\mathbf{p}^{(n-1)}), \mathbf{p}^{(n)} = (\mathbf{b} - \mu \mathbf{1})_+, \quad (3)$$

where  $\mathbf{p} = [p_{ij}]$ ,  $i, j = 1, \dots, |\mathcal{A}|$ ,  $\psi_{v2}(\mathbf{p}) = \sum_{i=1}^{|\mathcal{A}|} \sum_{j=1}^{|\mathcal{A}|} p_{ij} \ell_{v2}(\mathbf{G}, A^i, A^j, \theta', \theta''^i, \theta''^j) - \frac{\gamma}{2} \sum_{i=1}^{|\mathcal{A}|} \sum_{j=1}^{|\mathcal{A}|} (p_{ij} - \frac{1}{|\mathcal{A}|^2})^2$ ,  $\alpha'' \in \mathcal{R}_{>0}$  is the learning rate,  $\mu$  is the root of the equation  $\mathbf{1}^T (\mathbf{b} - \mu \mathbf{1}) = 1$ , and  $(\cdot)_+$  is the element-wise non-negative operator.

### B. Dataset Statistics

Dataset statistics can be found in Table S1, S2 and S3.

**Table S1:** Statistics for datasets of diverse nature from the benchmark TUDataset.

| Dataset  | Graph Count | Avg. Node | Avg. Degree |
|----------|-------------|-----------|-------------|
| NCI1     | 4,110       | 29.87     | 1.08        |
| PROTEINS | 1,113       | 39.06     | 1.86        |
| DD       | 1,178       | 284.32    | 715.66      |
| MUTAG    | 188         | 17.93     | 19.79       |
| COLLAB   | 5,000       | 74.49     | 32.99       |
| RDT-B    | 2,000       | 429.63    | 1.15        |
| RDB-M    | 2,000       | 429.63    | 497.75      |
| GITHUB   | 4,999       | 508.52    | 594.87      |
| IMDB-B   | 1,000       | 19.77     | 96.53       |

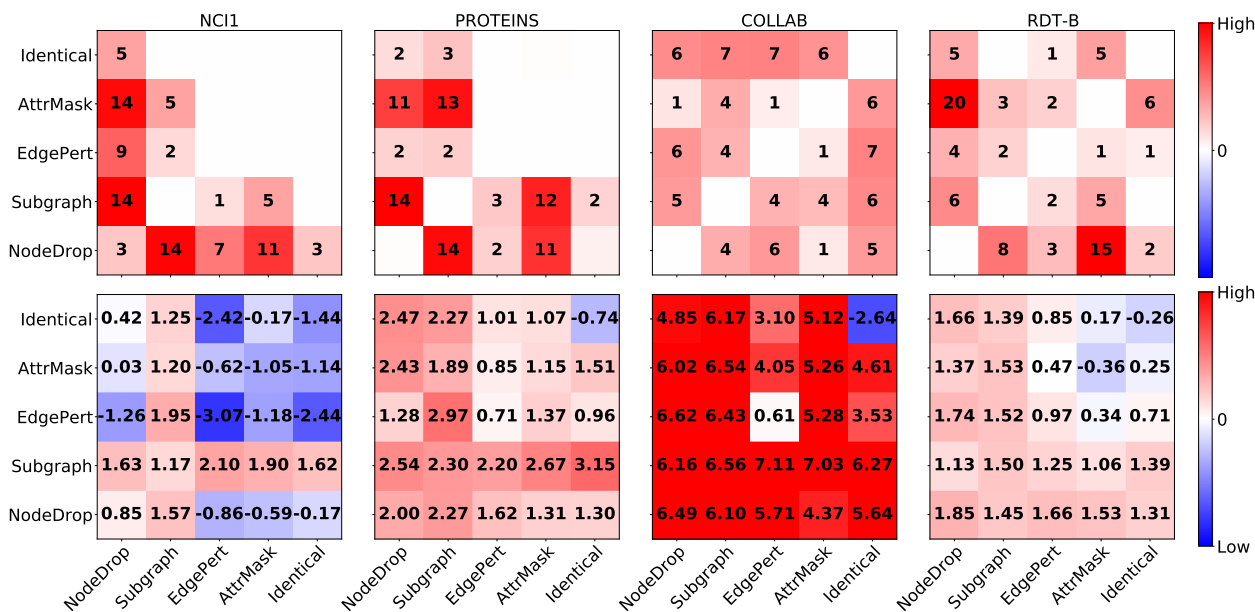

**Figure S1:** **Top row:** sampling distributions (% , defined as the percentage of this specific augmentation pair being selected during the entire training process) for augmentation pairs selected by JOAOv2 on four different datasets (NCI1, PROTEINS, COLLAB, and RDT-B ). **Bottom row:** GraphCL performance gains when exhaustively trying every possible augmentation pair. Warmer (colder) colors indicate higher (lower) values, and white marks 0.

**Table S2:** Statistics for bioinformatics datasets.

| Dataset | Graph Count | Avg. Node | Avg. Degree |
|---------|-------------|-----------|-------------|
| BBBP    | 2,039       | 24.06     | 51.90       |
| Tox21   | 7,831       | 18.57     | 38.58       |
| ToxCast | 8,576       | 18.78     | 38.52       |
| SIDER   | 1,427       | 33.64     | 70.71       |
| ClinTox | 1,477       | 26.15     | 55.76       |
| MUV     | 93,087      | 24.23     | 52.55       |
| HIV     | 41,127      | 25.51     | 54.93       |
| BACE    | 1,513       | 34.08     | 73.71       |
| PPI     | 88,000      | 49.35     | 890.77      |

**Table S3:** Statistics for large-scale OGB datasets.

| Dataset   | Graph Count | Avg. Node | Avg. Degree |
|-----------|-------------|-----------|-------------|
| ogbg-ppa  | 158,110     | 243.4     | 2,266.1     |
| ogbg-code | 452,741     | 125.2     | 124.2       |

### C. Augmentation Sampling Rules for GraphCL

GraphCL uniformly samples augmentations from a pre-defined pool. Augmentation pools for datasets are presented in Table S4.

**Table S4:** Pre-defined augmentation pools for different datasets.

| Datasets  | Augmentation Pools                       |
|-----------|------------------------------------------|
| NCI1      | {NodeDrop, Subgraph}                     |
| PROTEINS  | {NodeDrop, Subgraph}                     |
| DD        | {NodeDrop, Subgraph}                     |
| MUTAG     | {NodeDrop, Subgraph}                     |
| COLLAB    | {NodeDrop, Subgraph, EdgePert, AttrMask} |
| RDT-B     | {NodeDrop, Subgraph, EdgePert}           |
| RDB-M     | {NodeDrop, Subgraph, EdgePert}           |
| GITHUB    | {NodeDrop, Subgraph, EdgePert, AttrMask} |
| IMDB-B    | {NodeDrop, Subgraph}                     |
| BBBP      | {NodeDrop, Subgraph}                     |
| Tox21     | {NodeDrop, Subgraph}                     |
| ToxCast   | {NodeDrop, Subgraph}                     |
| SIDER     | {NodeDrop, Subgraph}                     |
| ClinTox   | {NodeDrop, Subgraph}                     |
| MUV       | {NodeDrop, Subgraph}                     |
| HIV       | {NodeDrop, Subgraph}                     |
| BACE      | {NodeDrop, Subgraph}                     |
| PPI       | {NodeDrop, Subgraph, EdgePert}           |
| ogbg-ppa  | {NodeDrop, Subgraph, EdgePert}           |
| ogbg-code | {NodeDrop, Subgraph}                     |

### D. JOAOv2 Selected Augmentation-Pairs Alignment with Previous “Best Practices”

Schematic diagram of JOAOv2 is drawn in Figure S2.  $\mathbb{P}_{(A_1, A_2)}$  optimized by JOAOv2 is plotted in the top row of Figure S1 along with GraphCL performance gains of different augmentation pairs in the bottom row, following

the same procedure as described in Sec. 3.2.1 of main text.

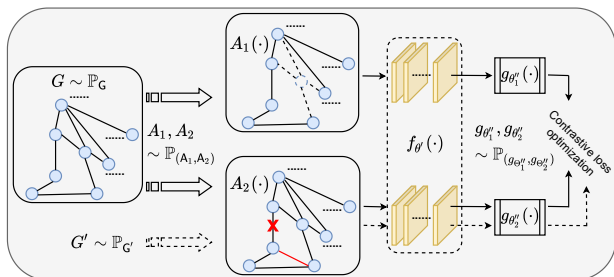

**Figure S2:** Schematic diagram of GraphCL with multiple augmentation-aware projection heads where  $\mathbb{P}_{(g_{\Theta_1'}, g_{\Theta_2'})} = \mathbb{P}_{(A_1, A_2)}$ .

## E. Comparison between JOAO w/ and w/o the Prior

See Table S5 for comparison between JOAO w/ and w/ the prior in the semi-supervised learning setting.

**Table S5:** Semi-supervised performance (%) of JOAO w/ and w/o prior.

| $\gamma$ | w/o prior  | w/ prior   |
|----------|------------|------------|
| NCI1     | 61.51±0.32 | 61.97±0.72 |
| PROTEINS | 71.78±0.70 | 72.13±0.92 |
